# Supplementary material for: Combined Transcriptomics and Metabolomics Analysis Reveals the Molecular Mechanism of Salt Tolerance of Huayouza 62, an Elite Cultivar in Rapeseed (Brassica napus L.)
Source: MDPI journal article supplement (doi:10.3390/ijms23031279), 2022-01-24
Supplement: s1 [file s1]

## Supplementary data

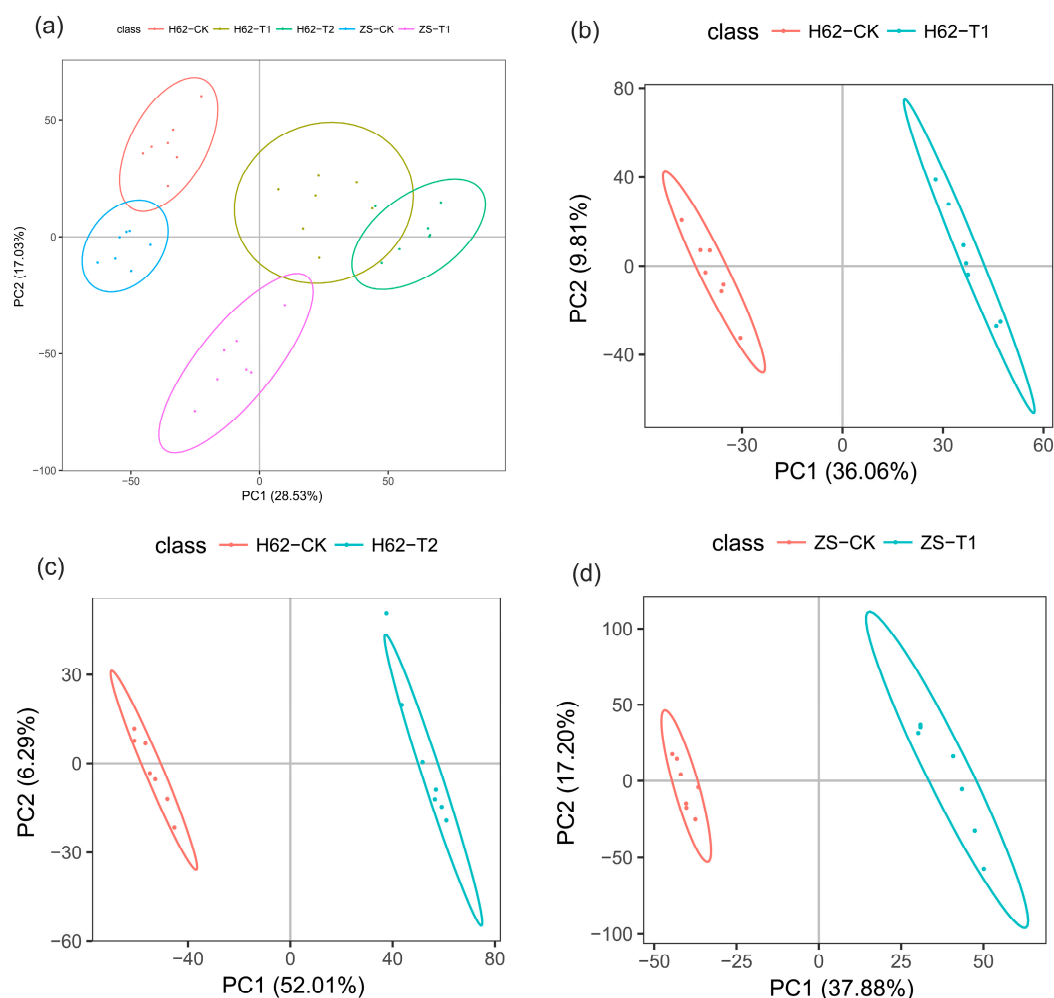

**Figure S1.** PCA and PLS-DA scatter plot of two rapeseed varieties under different treatments.

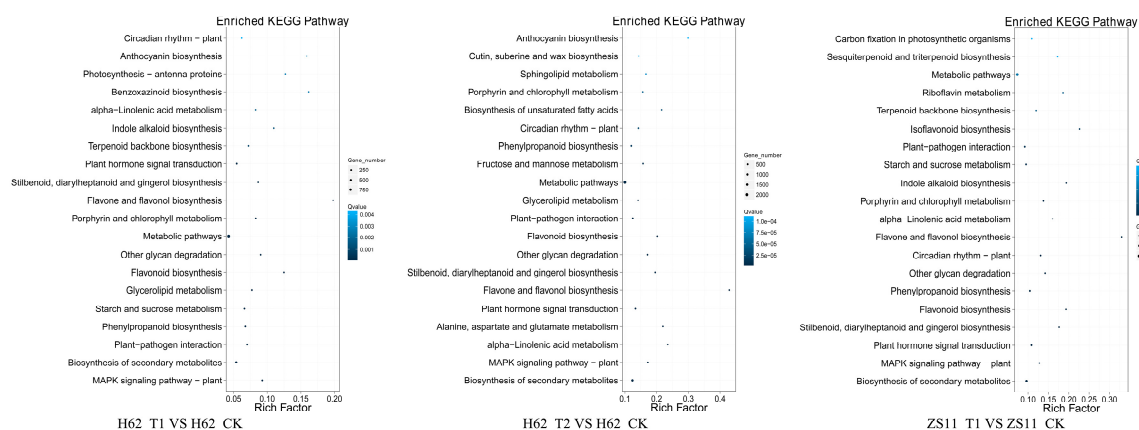

**Figure S2.** The KEGG pathways the DEGs in H62\_T1 VS H62\_CK, H62\_T2 VS H62\_CK, ZS11\_T1 VS ZS11\_CK.

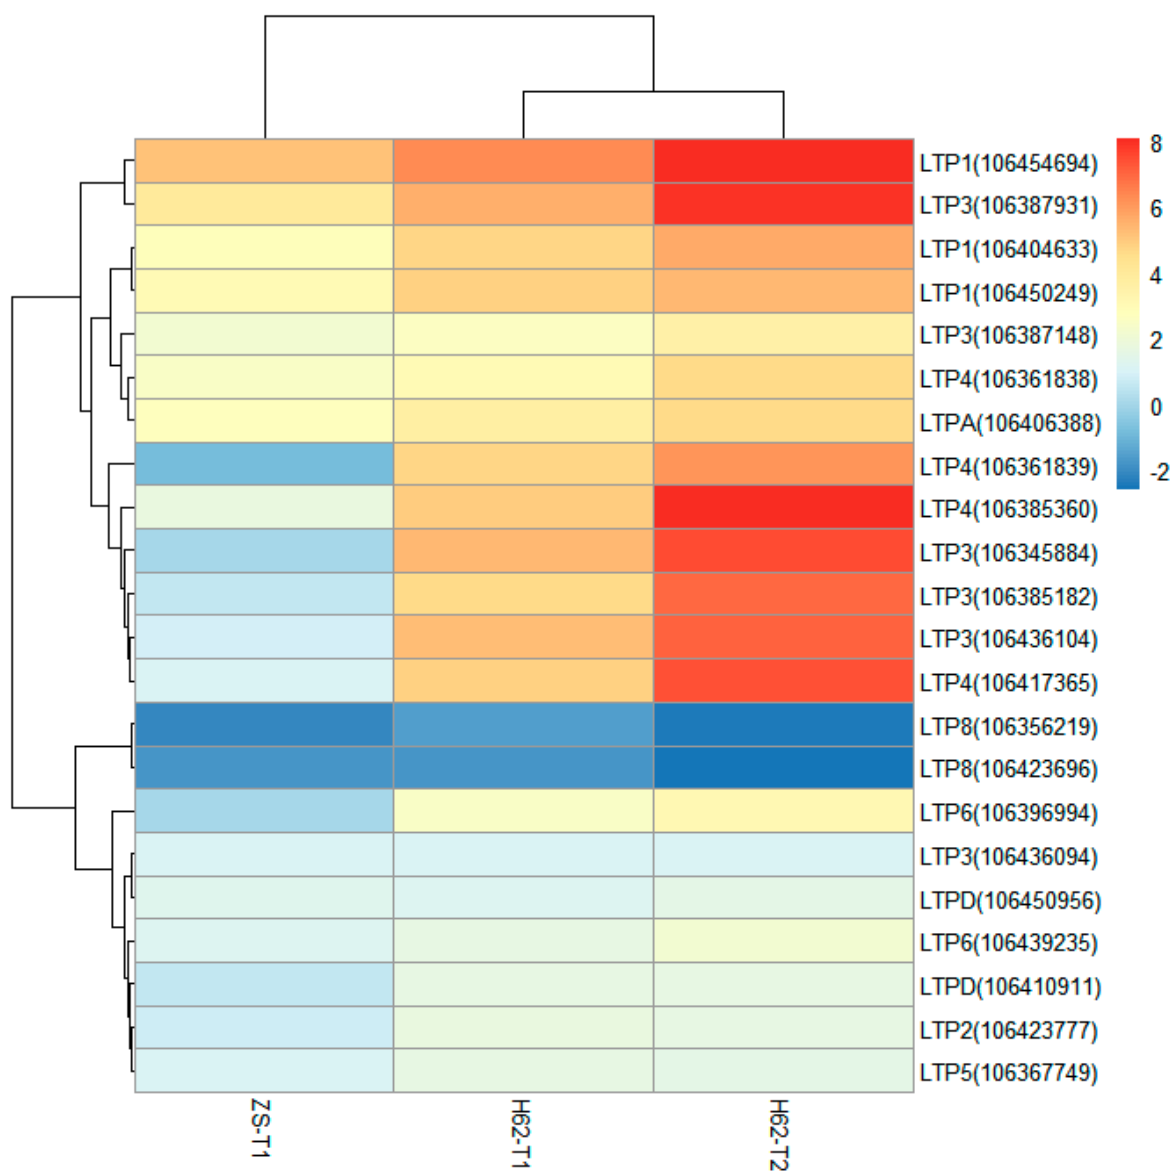

**Figure S3.** The heat map of nsLTP genes expression pattern two rapeseed varieties under different treatments base on the log<sub>2</sub>Foldchange.

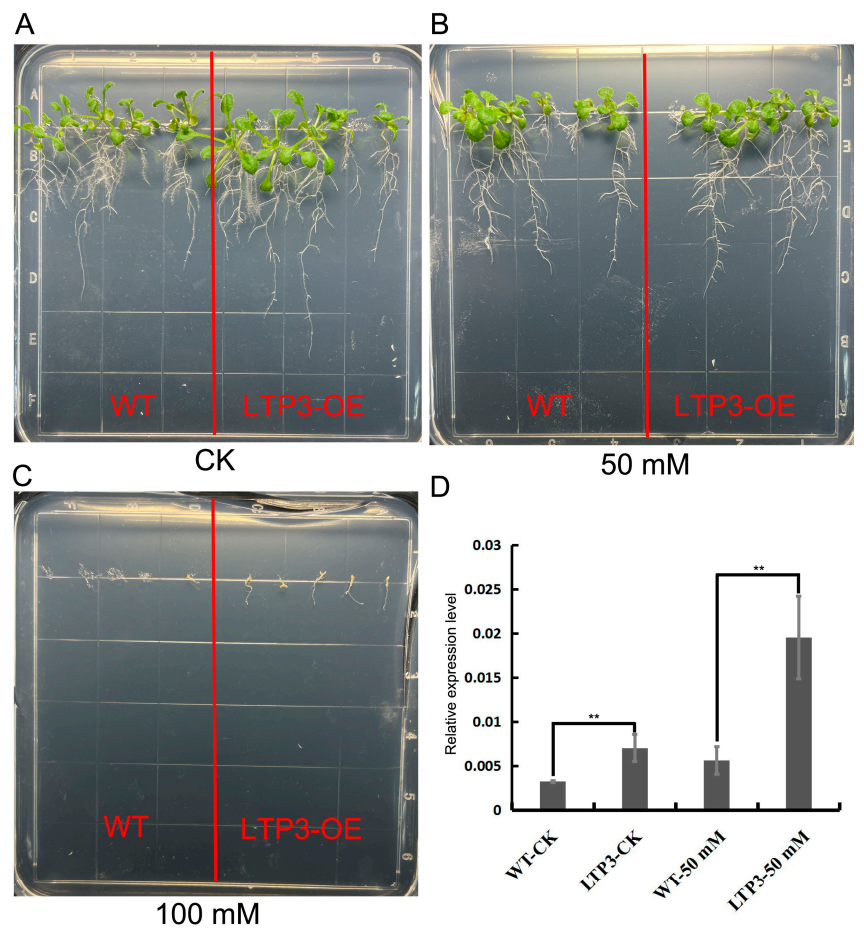

**Figure S4.** Over-expression of *BnLTP3* in *Arabidopsis thaliana*.

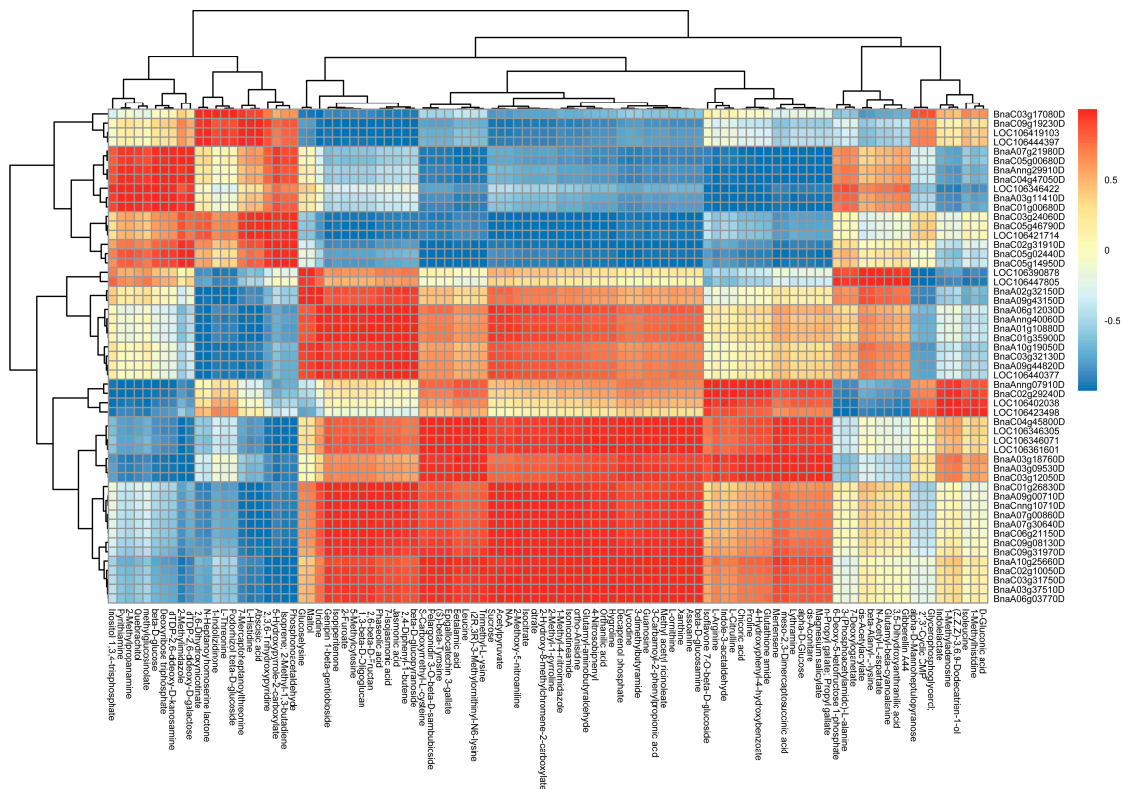

**Figure S5.** The correlation analysis of key DEMs and DEGs.

**Table S1.** The primer sequence of qPCR verification gene.

| Gene ID   | <i>B.napus</i> name | Forward Primer        | Reversed Primer       | PCR product Lenth (bp) |
|-----------|---------------------|-----------------------|-----------------------|------------------------|
| 106390833 | BnaA01g27710D       | GCACGATGACAGCACTA     | CTCAGCACTTGACCTCC     | 100                    |
| 106415866 | BnaC07g17990D       | CTGAGGCTCGTACTTACC    | AACCACCCAAATCTTCC     | 233                    |
| 106347720 | BnaC05g27530D       | AATGCTACTTTCAATCGCTAC | GCTGTTCCTCCTCTGATACTC | 264                    |
| 106381333 | BnaA02g12330D       | TCTTCAGACAGCGTTTCATT  | GGAGATAGATCCGTCAGGTAC | 126                    |
| 106401061 | BnaC05g15180D       | ATCAACATCTCCGACAAACC  | CCTTCAGGACTAATGGCTAA  | 50                     |
| 106436104 | BnaA03g09530D       | GTTCTCTCTCCGTGTTGTG   | TGTCGCAGTTCGTGCTCAT   | 199                    |

Table S2. Kyoto Encyclopedia of Genes and Genomes (KEGG) pathway analysis of the DEMs.

Table S3. The key DEMs responding to salt stress.

Table S4. Kyoto Encyclopedia of Genes and Genomes (KEGG) pathway analysis of the DEGs.

Table S5. The candidate genes related to salt stress.
